# Supplementary material for: Rapid and Sensitive Multiplex Detection of Burkholderia pseudomallei-Specific Antibodies in Melioidosis Patients Based on a Protein Microarray Approach
Source: PubMed Central journal article supplement (PMC4948818; doi:10.1371/journal.pntd.0004847), 2016-07-18

BPSS0477-His  
BPSL2697-His  
BPSL2096-His  
BPSS1532-344-His

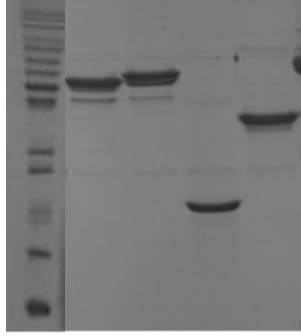

BPSS1532-344-Strep  
BPSL2698-Strep  
BPSL2030-Strep  
BPSL2522-Strep  
BPSL2697-Strep  
BPSS1722-Strep  
BPSS1385-Strep

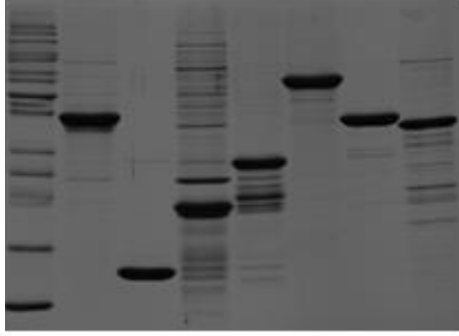

BPSS0477-Strep  
BPSL1661-1002-Strep  
BPSL1661-1001-Strep  
BPSL2520-Strep  
BPSS1516-Strep  
BPSS0530-Strep  
BPSL2096-Strep

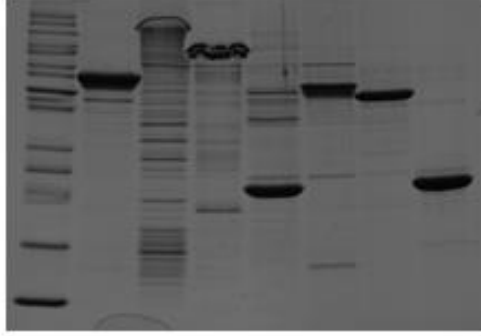

BPSS0476-Strep  
BPSL1445-Strep  
BPSL3319-Strep  
BPSS1525-79-Strep  
BPSL0280-Strep  
BPSS2141-Strep

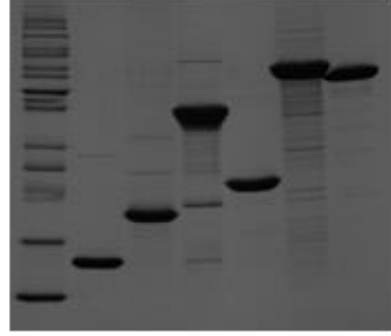

Supplement: pntd.0004847.s002.pdf [file pntd.0004847.s002.pdf]
