# Supplementary material for: Rapid and Sensitive Multiplex Detection of Burkholderia pseudomallei-Specific Antibodies in Melioidosis Patients Based on a Protein Microarray Approach
Source: PubMed Central journal article supplement (PMC4948818; doi:10.1371/journal.pntd.0004847), 2016-07-18
Supplement: pntd.0004847.s003.pdf [file pntd.0004847.s003.pdf]

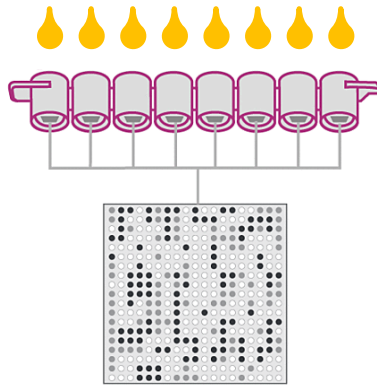

**Incubation of  
Arraystrip® with  
Melioidosis positive /  
negative blood sera /  
plasmas**

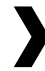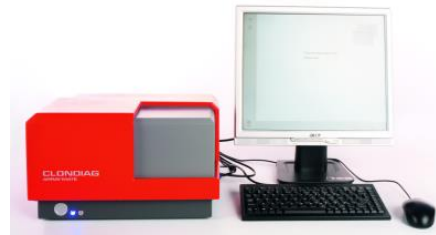

**Processing by the  
ArrayMate equipment  
(Alere Technologies  
GmbH, Jena)**

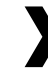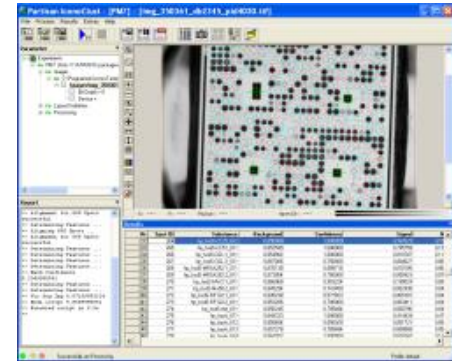

**Analysis and  
Interpretation of data,  
IconoClust® software**
