# Supplementary material for: Rapid and Sensitive Multiplex Detection of Burkholderia pseudomallei-Specific Antibodies in Melioidosis Patients Based on a Protein Microarray Approach
Source: PubMed Central journal article supplement (PMC4948818; doi:10.1371/journal.pntd.0004847), 2016-07-18
Supplement: pntd.0004847.s004.pdf [file pntd.0004847.s004.pdf]

### Melioidosis positive sera (n=171)

### Melioidosis negative sera (n=185)

week 0  
n=75

week 12  
n=50

week 52  
n=46

Healthy, U.R.,  
Thailand n=50

Healthy, B.,  
Thailand  
n=25

Healthy, U.R.  
Diabetes  
n=25

Healthy,  
Germany  
n=25

Bacteremia/Fungaemia,  
Germany n=60

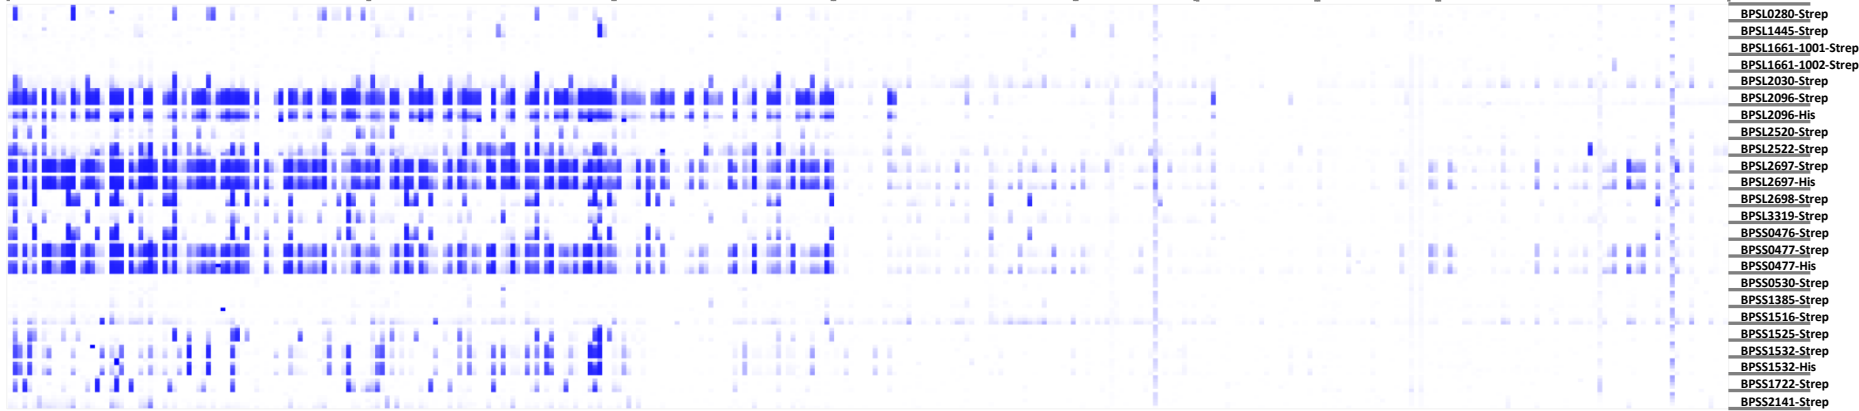

BPSL0280-Strep  
BPSL1445-Strep  
BPSL1661-1001-Strep  
BPSL1661-1002-Strep  
BPSL2030-Strep  
BPSL2096-Strep  
BPSL2096-His  
BPSL2520-Strep  
BPSL2522-Strep  
BPSL2697-Strep  
BPSL2697-His  
BPSL2698-Strep  
BPSL3319-Strep  
BPSS0476-Strep  
BPSS0477-Strep  
BPSS0477-His  
BPSS0530-Strep  
BPSS1385-Strep  
BPSS1516-Strep  
BPSS1525-Strep  
BPSS1532-Strep  
BPSS1532-His  
BPSS1722-Strep  
BPSS2141-Strep

0 signal intensity 1
