# Supplementary material for: Rapid and Sensitive Multiplex Detection of Burkholderia pseudomallei-Specific Antibodies in Melioidosis Patients Based on a Protein Microarray Approach
Source: PubMed Central journal article supplement (PMC4948818; doi:10.1371/journal.pntd.0004847), 2016-07-18

c=0.01 mg/ml

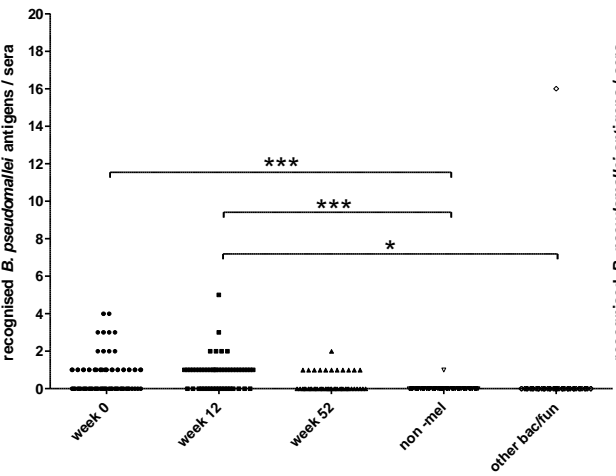

c=0.05 mg/ml

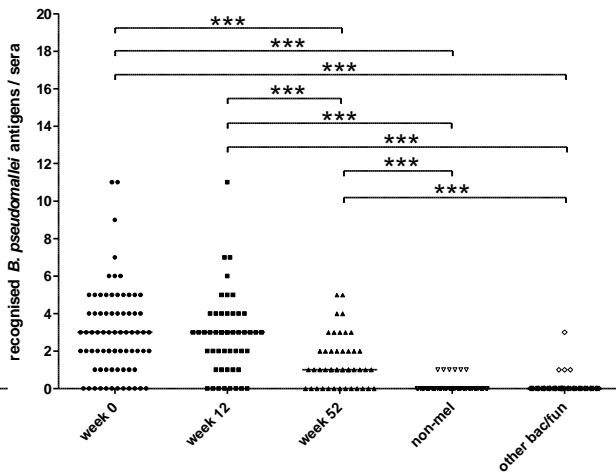

c=0.1 mg/ml

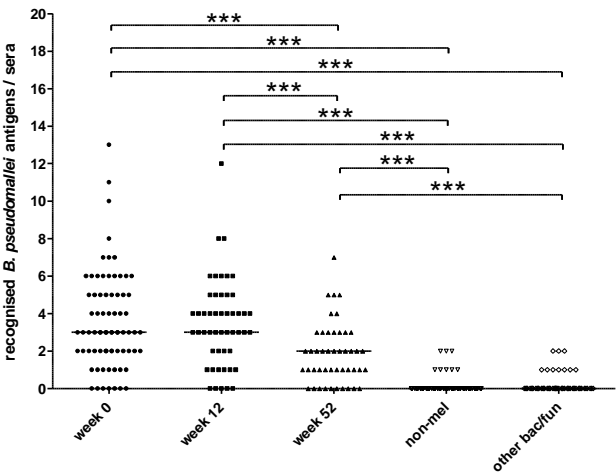

c=0.2 mg/ml

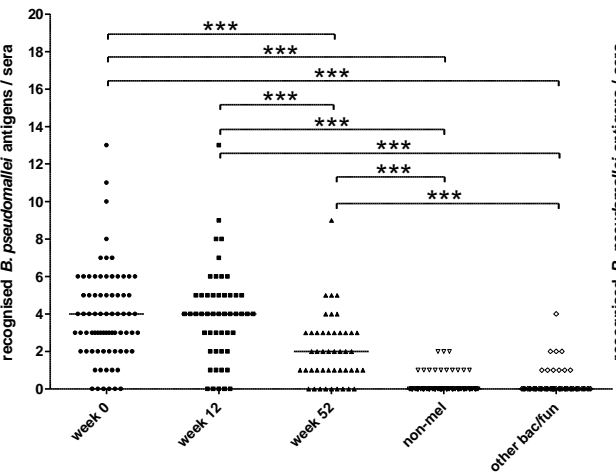

c=0.45 mg/ml

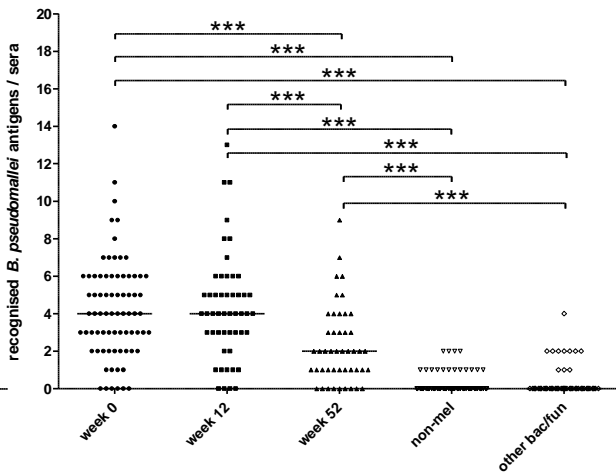

Supplement: pntd.0004847.s005.pdf [file pntd.0004847.s005.pdf]
