# Supplementary material for: Rapid and Sensitive Multiplex Detection of Burkholderia pseudomallei-Specific Antibodies in Melioidosis Patients Based on a Protein Microarray Approach
Source: PubMed Central journal article supplement (PMC4948818; doi:10.1371/journal.pntd.0004847), 2016-07-18

### serum/plasma 1

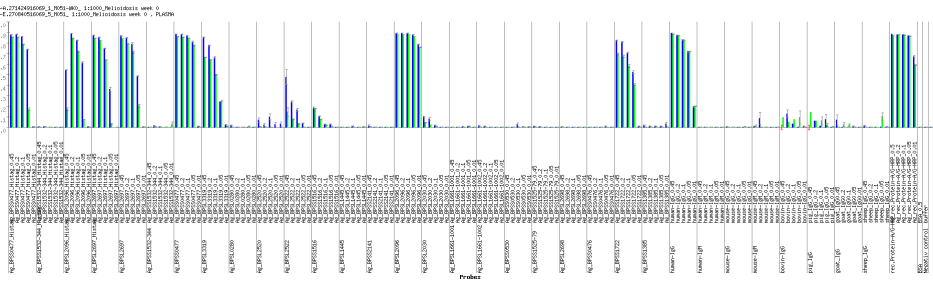

### serum/plasma 2

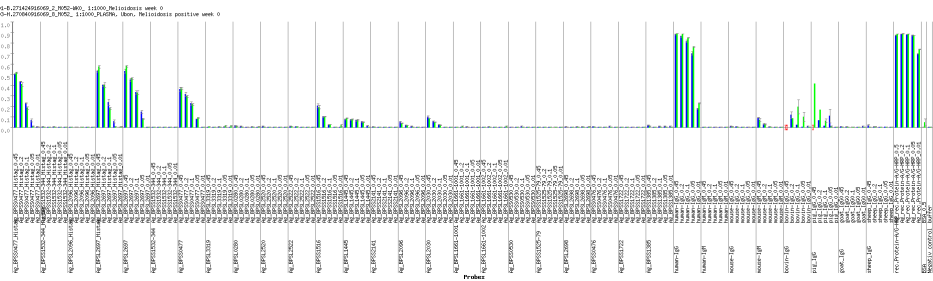

### serum/plasma 3

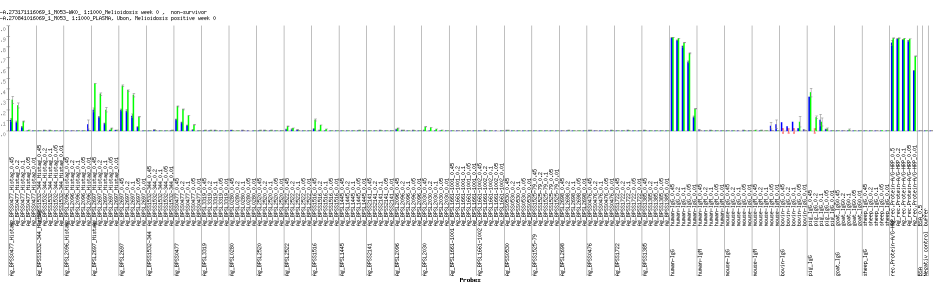



### serum/plasma 17

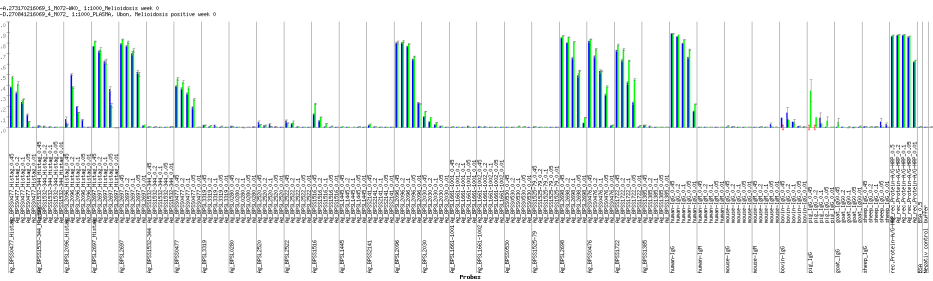

### serum/plasma 18

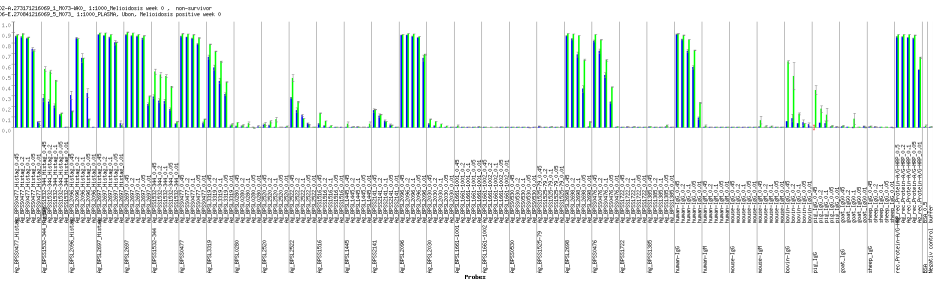

### serum/plasma 19

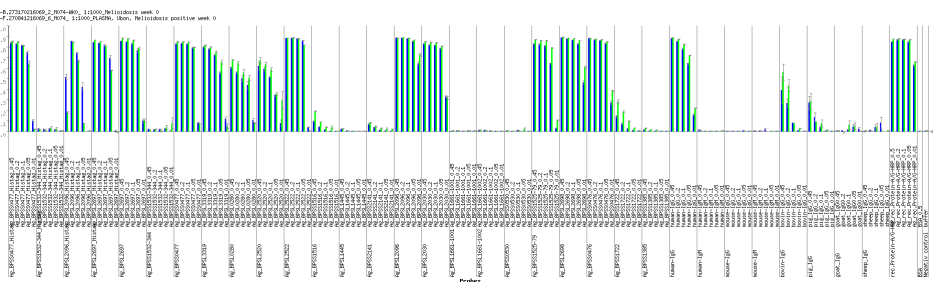

### serum/plasma 20

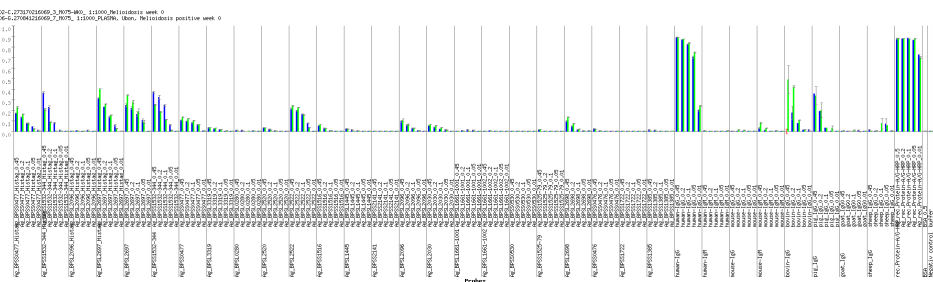

Supplement: pntd.0004847.s010.pdf [file pntd.0004847.s010.pdf]
