# Supplementary material for: Rapid and Sensitive Multiplex Detection of Burkholderia pseudomallei-Specific Antibodies in Melioidosis Patients Based on a Protein Microarray Approach
Source: PubMed Central journal article supplement (PMC4948818; doi:10.1371/journal.pntd.0004847), 2016-07-18
Supplement: pntd.0004847.s011.pdf [file pntd.0004847.s011.pdf]

| Strain                           | Characteristics                                | Reference                                            |
|----------------------------------|------------------------------------------------|------------------------------------------------------|
| <i>Escherichia coli</i>          |                                                |                                                      |
| DH5a                             | cloning host                                   | Invitrogen, Life technologies,<br>Darmstadt, Germany |
| BL21 (DE3) pLysS                 | expression strain                              | Invitrogen, Life technologies,<br>Darmstadt, Germany |
| <i>Burkholderia pseudomallei</i> |                                                |                                                      |
| K96243                           | <i>B. pseudomallei</i> strain K96243 wild type | Holden et al. 2004                                   |
| Plasmids                         |                                                |                                                      |
| pPR-IBA1                         | expression vector, <i>Strep</i> tag            | IBM GmbH, Goetingen, Germany                         |
| pASK-IBA33plus                   | expression vector, <i>His</i> tag              | IBM GmbH, Goetingen, Germany                         |
