# Supplementary material for: Rapid and Sensitive Multiplex Detection of Burkholderia pseudomallei-Specific Antibodies in Melioidosis Patients Based on a Protein Microarray Approach
Source: PubMed Central journal article supplement (PMC4948818; doi:10.1371/journal.pntd.0004847), 2016-07-18
Supplement: pntd.0004847.s012.pdf [file pntd.0004847.s012.pdf]

| <b>Antigen</b>  | <b>Used locus name for protein array</b> | <b>Primer forward 5'-3'</b>                    | <b>Primer reverse 5'-3'</b>                   | <b>Restriction enzyme</b> | <b>Plasmid</b> | <b>tag</b>           |
|-----------------|------------------------------------------|------------------------------------------------|-----------------------------------------------|---------------------------|----------------|----------------------|
| <b>BPSL0280</b> | BPSL0280                                 | ATGGTACGTCTCAAATGTCCAATA<br>CCCTCATGAACCTCGG   | ATGGTACGTCTCAGCGCTGTTGA<br>AGAGACCGAGCACGGTC  | BsmBI                     | pPR-IBA1       | C-terminal Strep-tag |
| <b>BPSL1445</b> | BPSL1445                                 | ATGGTAGGTCTCAAATGGGTTGCA<br>CGACGACGCCGGA      | ATGGTAGGTCTCAGCGCTGATCT<br>TCAGCTTCGTGACCTTCG | BsaI                      | pPR-IBA1       | C-terminal Strep-tag |
| <b>BPSL1661</b> | BPSL1661-1001                            | ATGGTAGGTCTCAAATGAATACGA<br>AGATGTTGCTGATAAGAG | ATGGTAGGTCTCAGCGCTACCGC<br>CGCTGCTGTCCGCC     | BsaI                      | pPR-IBA1       | C-terminal Strep-tag |
| <b>BPSL1661</b> | BPSL1661-1002                            | ATGGTAGGTCTCAAATGTGGACG<br>ACGACGTTGACGAGC     | ATGGTAGGTCTCAGCGCTGGGC<br>GTGAGCGCGGTCAGC     | BsaI                      | pPR-IBA1       | C-terminal Strep-tag |
| <b>BPSL2030</b> | BPSL2030                                 | ATGGTAGGTCTCAAATGCAGACCA<br>GCCCCCTCACGGG      | ATGGTAGGTCTCAGCGCTCCAGC<br>CGAGCGTGACGTTCA    | BsaI                      | pPR-IBA1       | C-terminal Strep-tag |
| <b>BPSL2096</b> | BPSL2096                                 | ATGGTAGGTCTCAAATGGGCGAC<br>GCGAAACAGGCGATC     | ATGGTAGAAGACAAGCGCTCAG<br>CGTCGCGCCGCCGATC    | BbsI                      | pPR-IBA1       | C-terminal Strep-tag |
| <b>BPSL2096</b> | BPSL2096                                 | ATGGTAGGTCTCAAATGGGCGAC<br>GCGAAACAGGCGATC     | ATGGTAGAAGACAAGCGCTCAG<br>CGTCGCGCCGCCGATC    | BbsI                      | pASK-IBA33plus | C-terminal His-tag   |
| <b>BPSL2520</b> | BPSL2520                                 | ATGGTAGGTCTCAAATGCAATCGC<br>TGTCGAACCAGACTTC   | ATGGTAGGTCTCAGCGCTCTTGC<br>CCGGCTTGACCGCCG    | BsaI                      | pPR-IBA1       | C-terminal Strep-tag |
| <b>BPSL2522</b> | BPSL2522                                 | ATGGTAGGTCTCAAATGCAGTCG<br>GTGCCGGCGTCGC       | ATGGTAGGTCTCAGCGCTCTGCG<br>CCGGAACGGTCTGTCT   | BsaI                      | pPR-IBA1       | C-terminal Strep-tag |
| <b>BPSL2697</b> | BPSL2697                                 | ATGGTAGGTCTCAAATGGCAGCTA<br>AAGACGTCGTATTCGG   | ATGGTAGGTCTCAGCGCTCATGT<br>CCATGCCCATGCCGCC   | BsaI                      | pPR-IBA1       | C-terminal Strep-tag |
| <b>BPSL2697</b> | BPSL2697                                 | ATGGTAGGTCTCAAATGGCAGCTA<br>AAGACGTCGTATTCGG   | ATGGTAGGTCTCAGCGCTCATGT<br>CCATGCCCATGCCGCC   | BsaI                      | pASK-IBA33plus | C-terminal His-tag   |
| <b>BPSL2698</b> | BPSL2698                                 | ATGGTAGGTCTCAAATGAACCTTC<br>GTCCGTTGCACGATC    | ATGGTAGGTCTCAGCGCTCTTAG<br>CGTTGACCACGGCCATG  | BsaI                      | pPR-IBA1       | C-terminal Strep-tag |
| <b>BPSL3319</b> | BPSL3319                                 | ATGGTAGAAGACAAAATGCTCGG<br>AATCAACAGCAACATTAAC | ATGGTAGAAGACAAGCGCTTTG<br>CAGGAGCTTCAGCACTTGC | BbsI                      | pPR-IBA1       | C-terminal Strep-tag |
| <b>BPSS0476</b> | BPSS0476                                 | ATGGTAGGTCTCAAATGAGCCTAC<br>GCCCCGTACACGAT     | ATGGTAGGTCTCAGCGCTGGAA<br>TGTACGACTGCGACGATG  | BsaI                      | pPR-IBA1       | C-terminal Strep-tag |
| <b>BPSS0477</b> | BPSS0477                                 | ATGGTAGGTCTCAAATGGCAGCG<br>AAAGAGATCATTTTCCAC  | ATGGTAGGTCTCAGCGCTGAAAT<br>CGAAGCCCCGGGCCGC   | BsaI                      | pASK-IBA33plus | C-terminal His-tag   |

**Table S2.** Continued.

| <b>Antigen</b>  | <b>Used locus name for protein array</b> | <b>Primer forward 5'-3'</b>                   | <b>Primer reverse 5'-3'</b>                  | <b>Restriction enzyme</b> | <b>Plasmid</b> | <b>tag</b>           |
|-----------------|------------------------------------------|-----------------------------------------------|----------------------------------------------|---------------------------|----------------|----------------------|
| <b>BPSS0477</b> | BPSS0477                                 | ATGGTAGGTCTCAAATGGCAGCGA<br>AAGAGATCATTTTCCAC | ATGGTAGGTCTCAGCGCTGAAAT<br>CGAAGCCCGGGCCGC   | Bsal                      | pPR-IBA1       | C-terminal Strep-tag |
| <b>BPSS0530</b> | BPSS0530                                 | ATGGTAGGTCTCAAATGAGTAGTCT<br>GCCGGTAGGACCG    | ATGGTAGGTCTCAGCGCTCGCCA<br>CCTTGCCGTCTCTCAG  | Bsal                      | pPR-IBA1       | C-terminal Strep-tag |
| <b>BPSS1385</b> | BPSS1385                                 | ATGGTAGGTCTCAAATGTTGGAGC<br>ACGGCGTCATGAAAAT  | ATGGTAGGTCTCAGCGCTGCCAA<br>GGCCGGCGACGTATTG  | Bsal                      | pPR-IBA1       | C-terminal Strep-tag |
| <b>BPSS1516</b> | BPSS1516                                 | ATGGTAGGTCTCAAATGAGTACCG<br>ACGATCTCGTCAAAGC  | ATGGTAGGTCTCAGCGCTTGCGA<br>GTGGGGTGTCTCTGTTT | Bsal                      | pPR-IBA1       | C-terminal Strep-tag |
| <b>BPSS1525</b> | BPSS1525-79                              | ATGGTAGGTCTCAAATGGGCGACG<br>CGAAACAGGCGATC    | ATGGTAGGTCTCAGCGCTCGCGC<br>CGTCCGCCCGGTTT    | Bsal                      | pPR-IBA1       | C-terminal Strep-tag |
| <b>BPSS1532</b> | BPSS1532-344                             | ATGGTAGGTCTCAAATGTCATCGG<br>GAGTGCAGGGCGG     | ATGGTAGGTCTCAGCGCTCTTGCC<br>GATGCAGCCCATCGT  | Bsal                      | pPR-IBA1       | C-terminal Strep-tag |
| <b>BPSS1532</b> | BPSS1532-344                             | ATGGTAGGTCTCAAATGTCATCGG<br>GAGTGCAGGGCGG     | ATGGTAGGTCTCAGCGCTCTTGCC<br>GATGCAGCCCATCGT  | Bsal                      | pASK-IBA33plus | C-terminal His-tag   |
| <b>BPSS1722</b> | BPSS1722                                 | ATGGTAGGTCTCAAATGGCTAAGC<br>CCGCAAAGCGCGTT    | ATGGTAGGTCTCAGCGCTCTTCAG<br>CAGATGGGCGACGCC  | Bsal                      | pPR-IBA1       | C-terminal Strep-tag |
| <b>BPSS2141</b> | BPSS2141                                 | ATGGTAGGTCTCAAATGGTCACCGT<br>TGCCTCGAATGTCA   | ATGGTAGGTCTCAGCGCTGTGCTT<br>GATCAGGTACATGCCT | Bsal                      | pPR-IBA1       | C-terminal Strep-tag |
