# Supplementary material for: Rapid and Sensitive Multiplex Detection of Burkholderia pseudomallei-Specific Antibodies in Melioidosis Patients Based on a Protein Microarray Approach
Source: PubMed Central journal article supplement (PMC4948818; doi:10.1371/journal.pntd.0004847), 2016-07-18
Supplement: pntd.0004847.s013.pdf [file pntd.0004847.s013.pdf]

| Species obtained from blood culture            | number |
|------------------------------------------------|--------|
| Gram-negative bacteria                         |        |
| <i>Bacteroides vulgatus</i>                    | 1      |
| <i>Escherichia coli</i>                        | 12     |
| <i>Haemophilus influenzae</i>                  | 2      |
| <i>Moraxella osloensis</i>                     | 1      |
| <i>Pseudomonas aeruginosa</i>                  | 4      |
| <i>Sphingomonas paucimobilis</i>               | 1      |
| <i>Stenotrophomonas maltophilia</i>            | 3      |
| <i>Raoultella (Klebsiella) ornithinolytica</i> | 2      |
| Gram-positive bacteria                         |        |
| <i>Propionibacterium acnes</i>                 | 1      |
| <i>Staphylococcus aureus</i>                   | 8      |
| <i>Staphylococcus capitis</i>                  | 2      |
| <i>Staphylococcus cohnii</i>                   | 1      |
| <i>Staphylococcus epidermidis</i>              | 2      |
| <i>Staphylococcus haemolyticus</i>             | 2      |
| <i>Staphylococcus hominis</i>                  | 1      |
| <i>Streptococcus agalactiae</i>                | 1      |
| <i>Streptococcus mitis/oralis</i>              | 2      |
| <i>Streptococcus pneumoniae</i>                | 4      |
| <i>Enterococcus faecalis</i>                   | 2      |
| <i>Enterococcus faecium</i>                    | 5      |
| Fungus                                         |        |
| <i>Candida albicans</i>                        | 3      |
| total                                          | 60     |
