# Supplementary material for: Rapid and Sensitive Multiplex Detection of Burkholderia pseudomallei-Specific Antibodies in Melioidosis Patients Based on a Protein Microarray Approach
Source: PubMed Central journal article supplement (PMC4948818; doi:10.1371/journal.pntd.0004847), 2016-07-18

**A**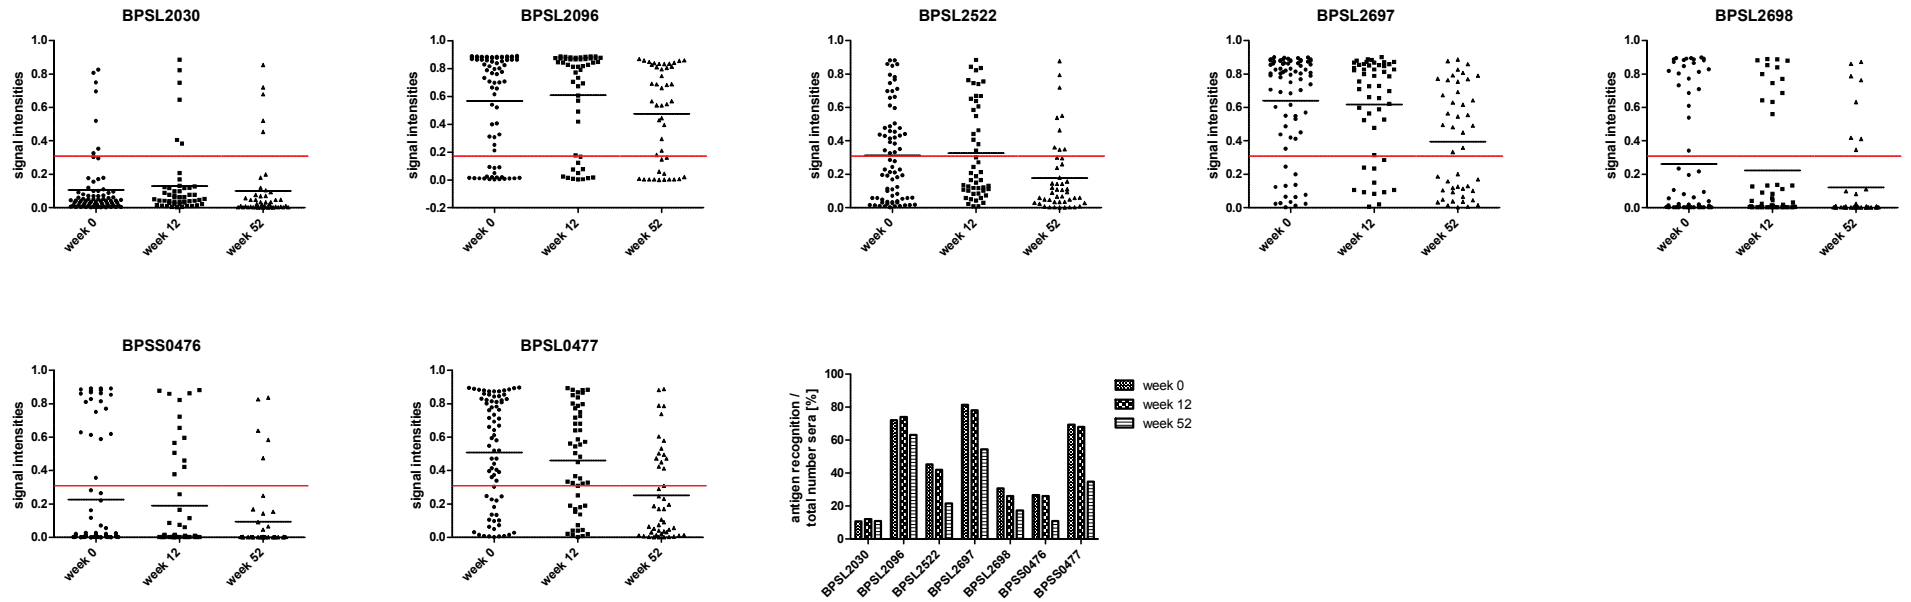**B**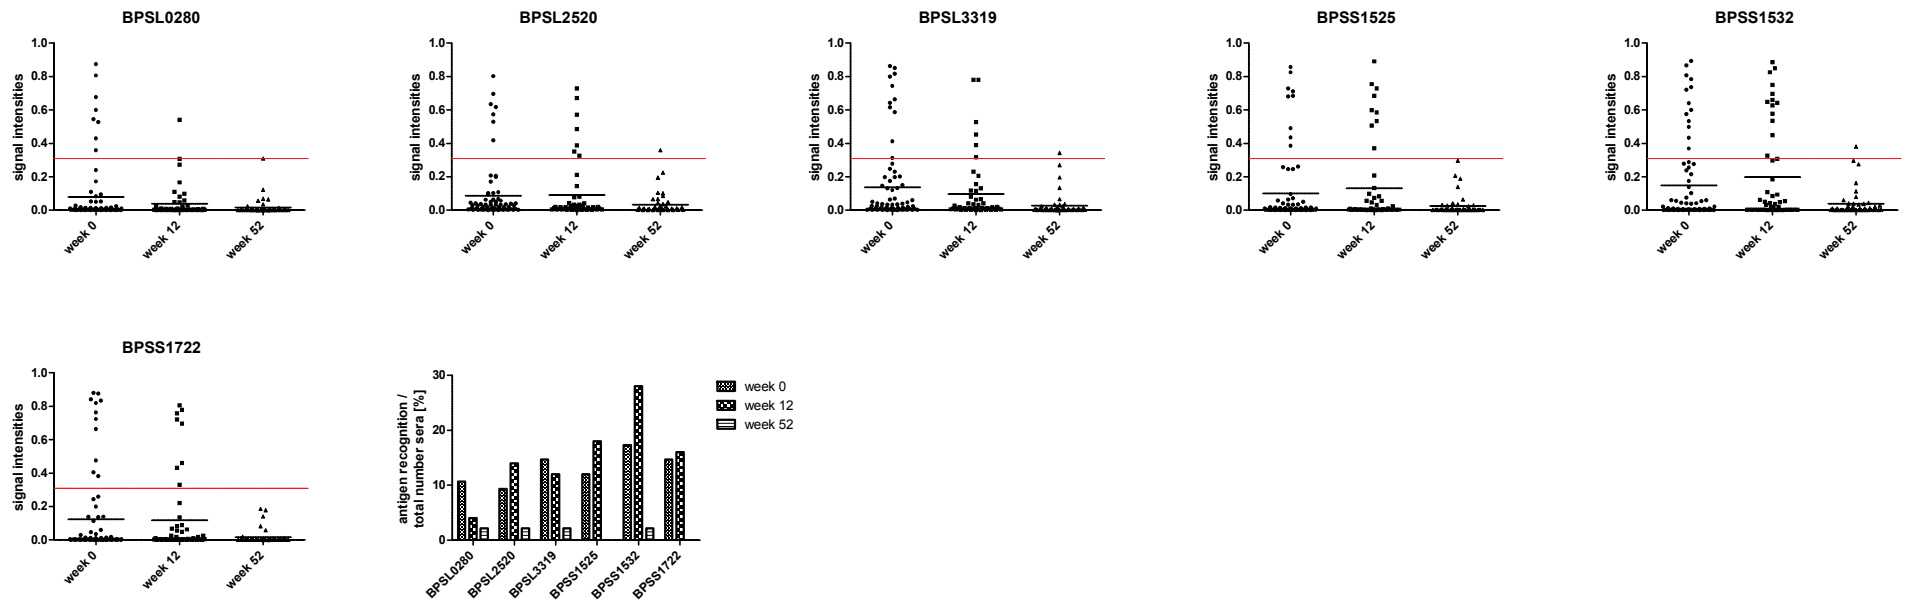

Supplement: pntd.0004847.s016.pdf [file pntd.0004847.s016.pdf]
