# Supplementary material for: Rapid and Sensitive Multiplex Detection of Burkholderia pseudomallei-Specific Antibodies in Melioidosis Patients Based on a Protein Microarray Approach
Source: PubMed Central journal article supplement (PMC4948818; doi:10.1371/journal.pntd.0004847), 2016-07-18
Supplement: pntd.0004847.s017.pdf [file pntd.0004847.s017.pdf]

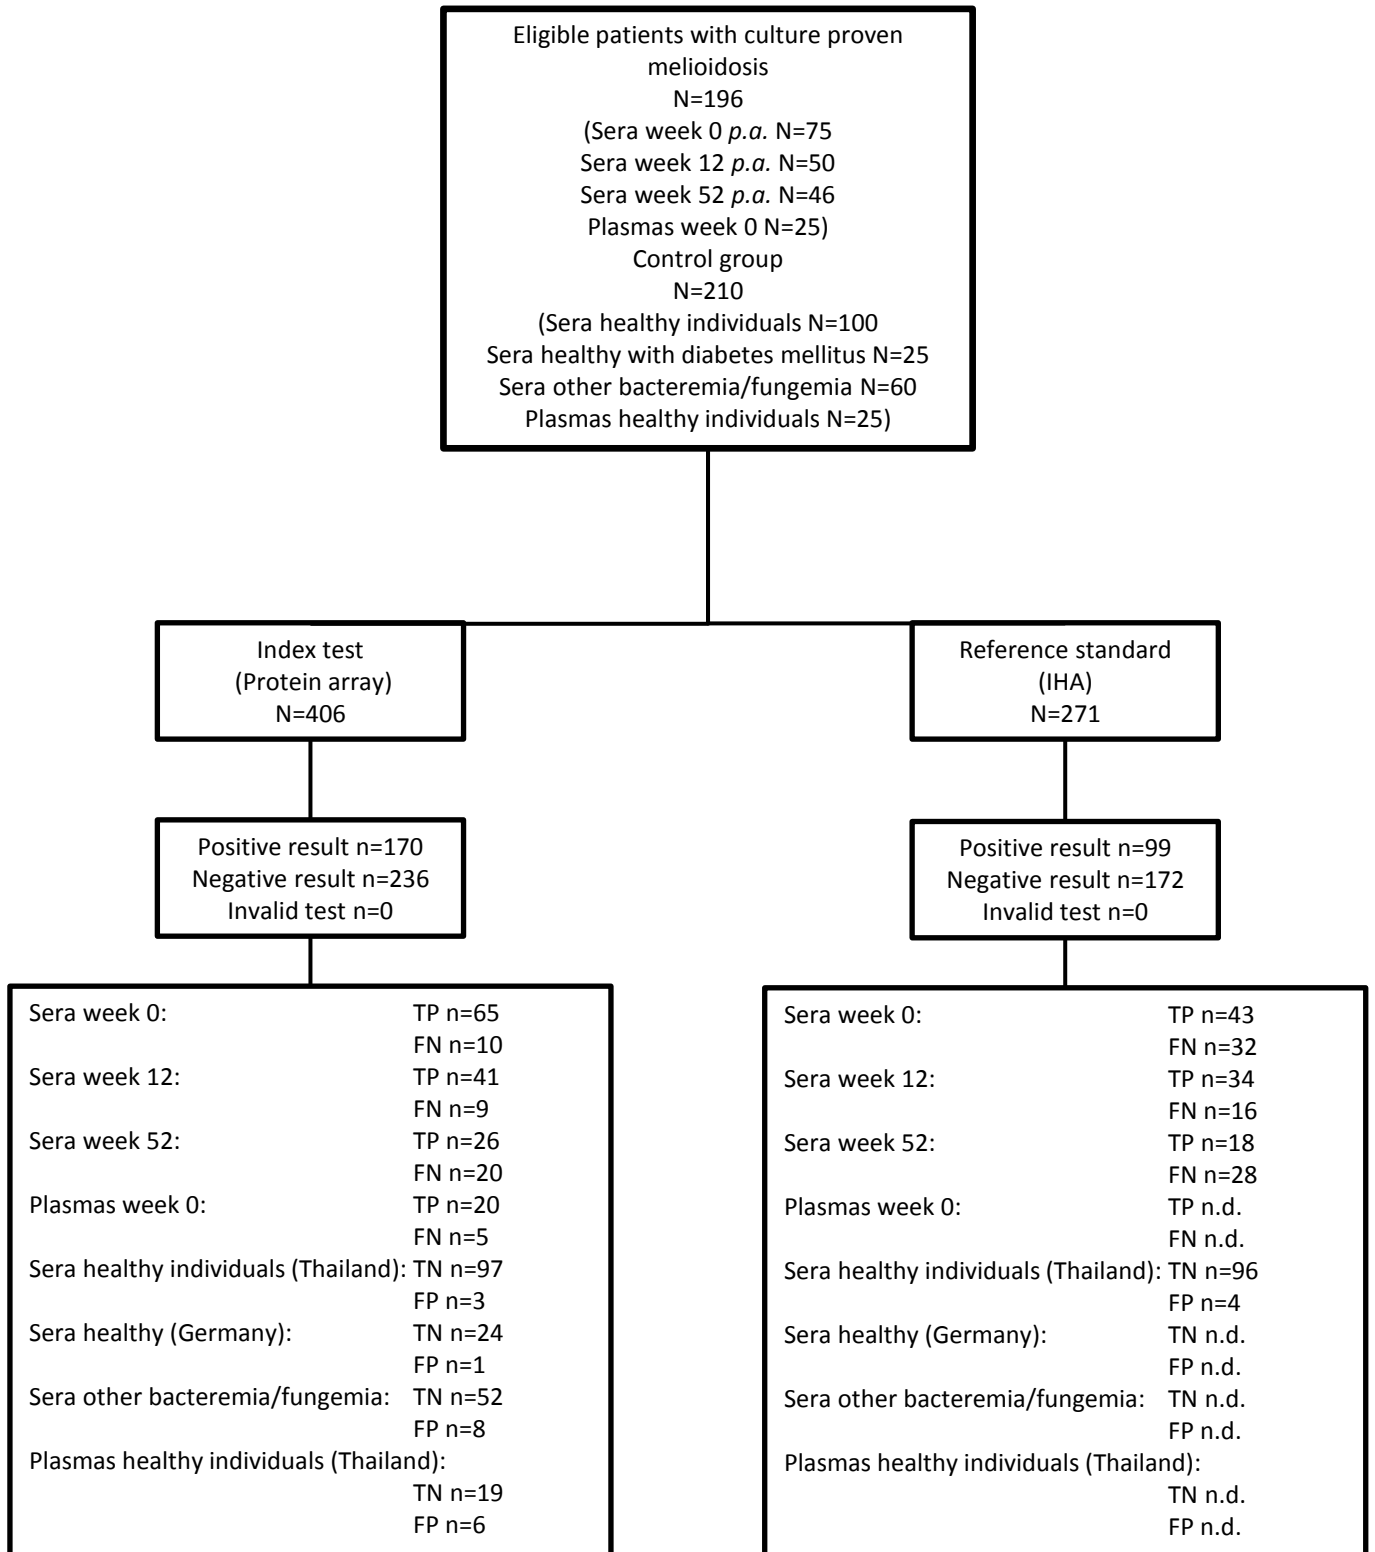

Abbr.: *p.a.* – post admission; n.d. – not determined; TP – true positive; FN – false negative; TN – true negative; FP – false positive
